# Supplementary material for: A novel human anti-interleukin-1β neutralizing monoclonal antibody showing in vivo efficacy
Source: PubMed Central journal article supplement — MAbs. 2014 Mar 26;6(3):764–72. doi: 10.4161/mabs.28614 (PMC4011920; doi:10.4161/mabs.28614), 2014-03-26

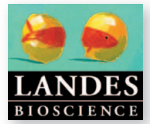

## **Supplemental Material to:**

**Angeline XH Goh, Sebastien Bertin-Maghit, Siok Ping Yeo,  
Adrian WS Ho, Heidi Derks, Alessandra Mortellaro, Cheng-I  
Wang**

**A novel human anti-interleukin-1 $\beta$  neutralizing  
monoclonal antibody showing in vivo efficacy**

**mAbs 2014; 6(3)**

**<http://dx.doi.org/10.4161/mabs.28614>**

**[www.landesbioscience.com/journals/mabs/article/28614/](http://www.landesbioscience.com/journals/mabs/article/28614/)**

Supplementary Figure 1:

Concentration of IL-6 in serum from multiple myeloma model surviving mice. Shown are measurements performed in triplicate by ELISA and representative of 3 independent assays performed in triplicate or duplicate.

Supplementary Figure 2:

Peritoneal infiltration of neutrophils in mice after administration of PBS, Anakinra 30 mg/kg, or P2D7KK 15 mg/kg followed 18 hours later by injection of monosodium urate crystals (MSU). Shown are mean  $\pm$  sem on 1 experiment with 8 mice per group. Data analysed by ANOVA followed by a multiple test with Bonferroni's correction: n.s. not significant, \*\*\*  $p < 0.001$ , \*\*\*\*  $p < 0.0001$ .

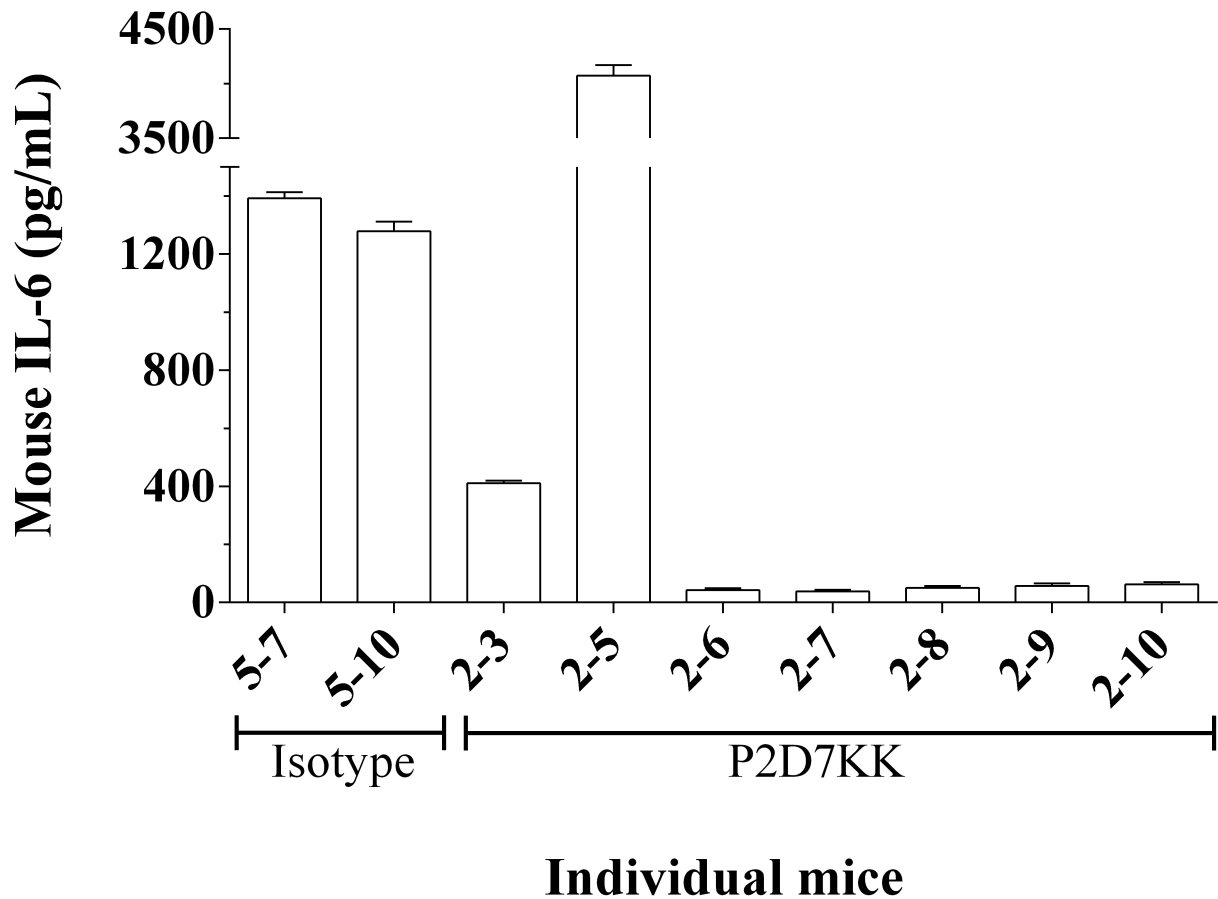

**Neutrophils number (x10<sup>3</sup>)**

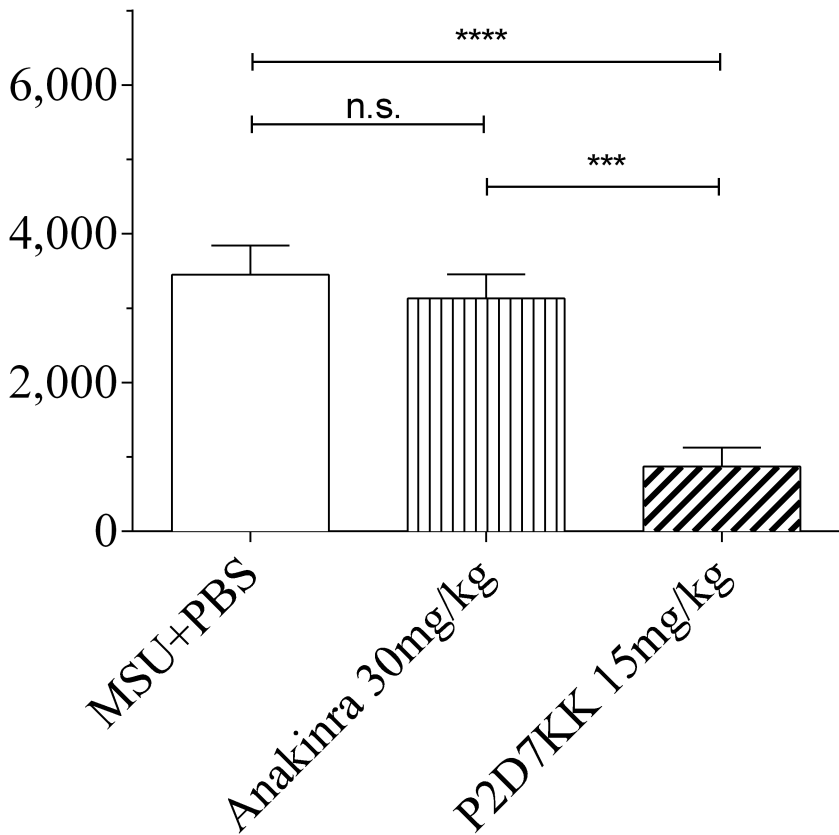

Supplement: mabs-6-764-s01.pdf [file mabs-6-764-s01.pdf]
